# Supplementary material for: Global DNA methylation synergistically regulates the nuclear and mitochondrial genomes in glioblastoma cells
Source: PubMed Central journal article supplement — Nucleic Acids Res. 2018 May 2;46(12):5977–95. doi: 10.1093/nar/gky339 (PMC6158714; doi:10.1093/nar/gky339), 2018-05-02
Supplement: gky339_supplemental_files.pdf [file gky339_supplemental_files.pdf]

Supplementary Files

**Global DNA methylation synergistically regulates the nuclear and mitochondrial genomes in glioblastoma cells.**

Xin Sun<sup>1,2</sup>, Jacqueline Johnson<sup>1</sup>, Justin C. St. John<sup>1,2</sup>

<sup>1</sup> Centre for Genetic Diseases, Hudson Institute of Medical Research, 27-31 Wright Street, Clayton VIC 3168, AUSTRALIA

<sup>2</sup> Department of Molecular and Translational Sciences, Monash University, 27-31 Wright Street, Clayton VIC 3168, AUSTRALIA

**Corresponding author:** Justin St. John, Voice: +61 3 8572 2678, Fax: +61 03 9594 7416;  
Email: [Justin.StJohn@hudson.org.au](mailto:Justin.StJohn@hudson.org.au)

**Supplementary Table 1: Primer pairs for long and real time PCR**

| Human Gene        | Forward primer (5'-3')        | Product size | Annealing Tm ( °C) |
|-------------------|-------------------------------|--------------|--------------------|
| β-globin-F        | CAACTTCATCCACGTTCCACC         | 268          | 57                 |
| β-globin-R        | GAAGAGCCAAGGACAGGTAC          |              |                    |
| mtDNA-F           | CGAAAGGACAAGAGAAATAAGG        | 152          | 53                 |
| mtDNA-R           | CTGTAAAGTTTTAAGTTTTATGCG      |              |                    |
| Long1-F (Set 1)   | GACGGGCTCACATCACCCATAA        | 8382         | 63                 |
| Long1-R (Set 1)   | GCGTACGGCCAGGGCTATTGGT        |              |                    |
| Long2-F (Set 1)   | GCCACAATAACCTCCTCGGACTCCT     | 8703         | 63                 |
| Long2-R (Set 1)   | GGTGGCTGGCACGAAATTGACC        |              |                    |
| Long1-F (Set 2)   | TACACATGCAAGCATCCCCGTTCCA     | 7871         | 63                 |
| Long1-R (Set 2)   | GGGCAATGAATGAAGCGAACAGATTTTCG |              |                    |
| Long2-F (Set 2)   | CAGTGATTATAGGCTTTCGCTCTAAG    | 7985         | 63                 |
| Long2-R (Set 2)   | TCTGTGTGAAAAGTGGCTGTGCAGA     |              |                    |
| RNR1-F            | TACACATGCAAGCATCCCCG          | 276          | 57.5               |
| RNR1-R            | GGGGAGGGGGTGATCTAAAA          |              |                    |
| RNR2-F            | GGGCATAACACAGCAAGACG          | 295          | 56.5               |
| RNR2-R            | AACATCGAGGTCGTAACCCT          |              |                    |
| CO1-F             | CTTCTCCTTACACCTAGCAG          | 143          | 55.5               |
| CO1-R             | GTAGGACTGCTGTGATTAGG          |              |                    |
| ND4-F             | CTGCCTACGACAAACAGAC           | 161          | 55.5               |
| ND4-R             | GGCAGAATAGTAATGAGGATG         |              |                    |
| ND4L-F            | GGATTAGACTGAACCGAATTG         | 176          | 54.5               |
| ND4L-R            | AGTAGGGAGGATATGAGGTG          |              |                    |
| O <sub>L</sub> -F | CAGCTAAGCACCCCTAATCAAC        | 162          | 55.5               |
| O <sub>L</sub> -R | TCTAAAGACAGGGGTAGGC           |              |                    |
| ND5-F             | AAACCCCATTAACGCCTGG           | 254          | 56.5               |
| ND5-R             | TGCGGTGTGTGATGCTAGG           |              |                    |
| CO3-F             | TCACCATTTCCGACGGCATC          | 109          | 57.5               |
| CO3-R             | TGGCGGATGAAGCAGATAGTG         |              |                    |
| ND3-F             | ACCACAACCTAACGGCTACAT         | 164          | 56.5               |
| ND3-R             | GGGCTCATGGTAGGGGTTAAA         |              |                    |
| CYTB-F            | ATGACCCCAATACGCAAACT          | 401          | 54.5               |
| CYTB-R            | GGGAGGACATAGCCTATGAA          |              |                    |
| CO2-F             | CTGCTTCCTAGTCCTGTATG          | 235          | 56.6               |
| CO2-R             | GTCGGTGTACTCGTAGGTTT          |              |                    |
| ND6-F             | CCGCACCAATAGGATCCTCCCGA       | 187          | 63.5               |
| ND6-R             | GCATGGGGGTCAGGGGTTGAG         |              |                    |
| ATP6-F            | CAGTGATTATAGGCTTTCGCTC        | 343          | 57.5               |
| ATP6-R            | GTGTTGTCGTGCAGGTAGAG          |              |                    |
| ND2-F             | ACCGTACAACCCTAACATAACC        | 166          | 57.5               |
| ND2-R             | GAGGAGGGTGGATGGAATTAAG        |              |                    |
| ATP8-F            | CACTATTCCTCATACCCCACTAA       | 140          | 56.5               |
| ATP8-R            | GGGCAATGAATGAAGCGAAC          |              |                    |
| LSP-F             | AGCCACTTTCCACACAGACATCATA     | 250          | 59                 |
| LSP-R             | TAGGATGGGCGGGGTTGTA           |              |                    |
| HSP-F             | TCAATACAACCCCGCCCAT           | 257          | 57.5               |
| HSP-R             | TCGTGGTGATTAGAGGGTGAA         |              |                    |
| O <sub>H</sub> -F | GAGCACCCCTATGTCGCAGTA         | 170          | 57                 |
| O <sub>H</sub> -R | TCTGTGTGAAAAGTGGCTGT          |              |                    |
| POLG exon2-F      | CAGACCTCCACGTCGAACAC          | 209          | 59.5               |
| POLG exon2-R      | GACAACCTGGACCAGCACTT          |              |                    |
| TOP1MT intron10-F | AAGGACATGTCAGCCGTTGG          | 136          | 59.5               |
| TOP1MT intron10-R | GACGACCTCTTCGACAGGC           |              |                    |
| TOP1MT exon8-F    | CCACCGGCACTCTGTTGTAG          | 197          | 59.5               |
| TOP1MT exon8-R    | ACCATTCCCCACCAACTAGC          |              |                    |

**Supplementary Table 2: Analytical parameters used for each of the bioinformatics analysis**

| <b>Burrows-Wheeler Aligner (BWA; 0.7.16a)</b> |                                                   |
|-----------------------------------------------|---------------------------------------------------|
| index                                         | -t 12 Homo_sapiens.GRCh38.dna.primary_assembly.fa |
| aln                                           | -t 12                                             |
| samse                                         |                                                   |
| <b>Samtools (1.4)</b>                         |                                                   |
| view                                          |                                                   |
| sort                                          |                                                   |
| merge                                         |                                                   |
| <b>MEDIPS (1.24.0)</b>                        |                                                   |
| extent                                        | 500                                               |
| window size                                   | 100                                               |
| shift                                         | 0                                                 |
| uniq                                          | 1                                                 |
| MEDIPS.couplingVector-pattern                 | CG                                                |
| MEDIPS.couplingVector-RefObj                  | GBM[[1]]                                          |
| MEDIPS.meth-diff.method                       | edgeR                                             |
| MEDIPS.meth- MEDIPS                           | TRUE                                              |
| MEDIPS.meth-minRowSum                         | 100                                               |
| MEDIPS.meth-p.adj                             | bonferroni                                        |
| MEDIPS.selectSig-pvalue                       | 0.05                                              |
| MEDIPS.selectSig-agj                          | TRUE                                              |
| <b>HTqPCR(1.28)</b>                           |                                                   |
| readCtData-na.value                           | 40                                                |
| normalizeCtData-norm                          | deltaCt                                           |
| normalizeCtData-deltaCt.genes                 | OAZ1;HPRT1;ActB/18SrRNA                           |
| limmaCtData                                   |                                                   |
| <b>STAR(2.5.3a)</b>                           |                                                   |
| genomeFastaFiles                              | Homo_sapiens.GRCh38.dna.primary_assembly.fa       |
| sjdbGTFfile                                   | gencode.v26.annotation.gtf                        |
| <b>Rsubread-FeatureCounts (1.26.0)</b>        |                                                   |
| annot.inbuilt                                 | hg38                                              |
| edgeR for RNA seq                             |                                                   |
| calcNormFactors-method                        | TMM                                               |
| estimateGLMCommonDisp                         |                                                   |
| estimateGLMTrendedDisp                        |                                                   |
| estimateGLMTagwiseDisp                        |                                                   |
| glmFit                                        |                                                   |
| glmLRT                                        |                                                   |

**Supplementary Table 3. Taqman assays used in the Fluidigm qPCR arrays**

| Gene name | Taqman assay number |
|-----------|---------------------|
| 18SrRNA   | Hs99999901_s1       |
| Actb      | Hs99999903_m1       |
| ADGRB1    | Hs00181777_m1       |
| AGAP3     | Hs01553103_g1       |
| AGPAT4    | Hs01088853_m1       |
| ASL       | Hs00902699_m1       |
| BCL2      | Hs00608023_m1       |
| BCL3      | Hs00180403_m1       |
| C10orf2   | Hs00958168_g1       |
| C2CD4C    | Hs00985894_s1       |
| C7orf57   | Hs01102699_m1       |
| CCDC71L   | Hs00703139_s1       |
| CLIP2     | Hs00185593_m1       |
| CLU       | Hs00156548_m1       |
| COL22A1   | Hs01377218_m1       |
| COL4A2    | Hs01098873_m1       |
| CYC1      | Hs00357718_g1       |
| CYP4F11   | Hs01680107_m1       |
| DNMT1     | Hs00154749_m1       |
| DNMT3A    | Hs01027166_m1       |
| DNMT3B    | Hs00171876_m1       |
| DNMT3L    | Hs01081364_m1       |
| EGFR      | Hs01076090_m1       |
| ELN       | Hs00355783_m1       |
| ESRRA     | Hs01067166_g1       |
| Esrrb     | Hs01584024_m1       |
| FAM20C    | Hs00911619_m1       |
| FAM222A   | Hs00757936_m1       |
| FAM49A    | Hs01003627_m1       |
| FBXO17    | Hs00227695_m1       |
| FCGBP     | Hs00175398_m1       |
| FNDC10    | Hs00972832_s1       |
| FZR1      | Hs00393592_m1       |
| GAS6      | Hs01090305_m1       |
| GTF2IRD1  | Hs00249456_m1       |
| HIF1a     | Hs00153153_m1       |
| HPRT1     | Hs02800695_m1       |
| HSD17B14  | Hs00212233_m1       |
| HSPG2     | Hs01078536_m1       |
| IDH1      | Hs01855675_s1       |
| IDH2      | Hs00158033_m1       |
| KIF17     | Hs00325418_m1       |
| KIF21B    | Hs01118430_m1       |
| LRRC4B    | Hs00297475_s1       |
| LTBP4     | Hs00943217_m1       |
| LYPLA1    | Hs00911024_g1       |
| MAN1C1    | Hs01057229_m1       |
| MASP2     | Hs00373722_m1       |
| MEIS3     | Hs00908777_m1       |
| MEST      | Hs00853380_g1       |
| MT-ATP6   | Hs02596862_g1       |
| MT-ATP6   | Hs02596862_g1       |
| MT-ATP8   | Hs02596863_g1       |
| MT-CO1    | Hs02596864_g1       |
| MT-CO2    | Hs02596865_g1       |
| MT-CO3    | Hs02596866_g1       |
| MT-CYB    | Hs02596867_s1       |
| MT-ND1    | Hs02596873_s1       |

| Gene name | Taqman assay number |
|-----------|---------------------|
| MT-ND2    | Hs02596874_g1       |
| MT-ND3    | Hs02596875_s1       |
| MT-ND4    | Hs02596876_g1       |
| MT-ND4L   | Hs02596877_g1       |
| MT-ND5    | Hs02596878_g1       |
| MT-ND6    | Hs02596879_g1       |
| MTRNR1    | Hs02596859_g1       |
| MTRNR2    | Hs02596860_s1       |
| MTRNR2    | Hs02596860_s1       |
| MYC       | Hs00153408_m1       |
| MYT1      | Hs01027966_m1       |
| NACAD     | Hs00322395_m1       |
| NDUFAB1   | Hs00192290_m1       |
| NFE2L2    | Hs00975961_g1       |
| NKAIN4    | Hs03806373_m1       |
| NRF1      | Hs01031046_m1       |
| OAZ1      | Hs00427923_m1       |
| PALM3     | Hs00908820_g1       |
| PDGFA     | Hs00234994_m1       |
| PLEC      | Hs00356986_g1       |
| PLXNA4    | Hs01039085_m1       |
| POLG      | Hs00160298_m1       |
| POLG2     | Hs00200546_m1       |
| POLRMT    | Hs04187596_g1       |
| PPARGC1A  | Hs01016719_m1       |
| PRDM16    | Hs00223161_m1       |
| PRICKLE2  | Hs00291033_s1       |
| PRKAG2    | Hs00211903_m1       |
| PTPRS     | Hs01548375_m1       |
| RAB7B     | Hs01088520_m1       |
| SDHB      | Hs00268117_m1       |
| SDHC      | Hs01698067_s1       |
| SDHD      | Hs00829723_g1       |
| SEC61G    | Hs00414142_m1       |
| SHC2      | Hs01044373_m1       |
| SIRT1     | Hs01009006_m1       |
| SIRT3     | Hs00953477_m1       |
| SLCO4A1   | Hs00249583_m1       |
| SMARCD3   | Hs00162003_m1       |
| SNX10     | Hs00203362_m1       |
| SPPL2B    | Hs01086493_m1       |
| SSBP1     | Hs00995376_g1       |
| ST3GAL1   | Hs00161688_m1       |
| STAT3     | Hs01047580_m1       |
| TERT      | Hs00972650_m1       |
| TET1      | Hs00286756_m1       |
| TET2      | Hs00325999_m1       |
| TET3      | Hs00379125_m1       |
| TFAM      | Hs00273372_s1       |
| TFB1M     | Hs00274971_m1       |
| TFB2M     | Hs00915025_m1       |
| TLE3      | Hs01032572_m1       |
| TOP1MT    | Hs01080056_m1       |
| TP53      | Hs01034249_m1       |
| TSNARE1   | Hs00417029_g1       |
| TTYH1     | Hs01012139_m1       |
| WNK2      | Hs00396601_m1       |

**Supplementary Table 4: DMRs overlapping with copy number gain regions**

| CN gain-chr | CN gain-start | CN gain-end | Overlapping with VitC-DMR (Start-End)                         | Overlapping with 5Aza-DMR (Start-End)                         | Gene annotation                       |
|-------------|---------------|-------------|---------------------------------------------------------------|---------------------------------------------------------------|---------------------------------------|
| chr1        | 211088244     | 211213171   |                                                               |                                                               |                                       |
| chr1        | 219926421     | 220192189   |                                                               |                                                               |                                       |
| chr1        | 223872383     | 224349137   | 224012401-224012800; 224013301-224014100; 224014301-224014400 | 224012401-224013000; 224013301-224013900; 224014401-224014600 | RefSeq: NR_136593.1 Status: Validated |
| chr1        | 225562969     | 226344033   |                                                               |                                                               |                                       |
| chr1        | 235871996     | 236467557   | 236097001-236097300                                           |                                                               | RefSeq: NR_136593.1 Status: Validated |
| chr1        | 240509953     | 240721167   |                                                               |                                                               |                                       |
| chr2        | 23830787      | 24168230    |                                                               |                                                               |                                       |
| chr2        | 24279904      | 24347049    |                                                               |                                                               |                                       |
| chr2        | 25745122      | 25923850    |                                                               |                                                               |                                       |
| chr2        | 31822420      | 32698792    |                                                               |                                                               |                                       |
| chr2        | 36938466      | 37061471    |                                                               |                                                               |                                       |
| chr2        | 38546335      | 38790197    |                                                               |                                                               |                                       |
| chr2        | 44102040      | 44280450    |                                                               |                                                               |                                       |
| chr2        | 47359069      | 47475052    |                                                               |                                                               |                                       |
| chr2        | 47475248      | 47478329    |                                                               |                                                               |                                       |
| chr2        | 47806619      | 48081697    |                                                               |                                                               |                                       |
| chr2        | 55217933      | 55756611    |                                                               |                                                               |                                       |
| chr2        | 61356413      | 61981762    |                                                               |                                                               |                                       |
| chr2        | 88374324      | 88473434    |                                                               |                                                               |                                       |
| chr2        | 128092312     | 128149383   |                                                               |                                                               |                                       |
| chr2        | 169775289     | 169886104   |                                                               |                                                               |                                       |
| chr2        | 171836010     | 172029793   |                                                               |                                                               |                                       |
| chr2        | 200954453     | 201120309   |                                                               |                                                               |                                       |
| chr2        | 202146246     | 203571593   |                                                               |                                                               |                                       |
| chr2        | 207636569     | 207680279   |                                                               |                                                               |                                       |
| chr2        | 227736331     | 227801294   |                                                               |                                                               |                                       |
| chr2        | 231671719     | 231767569   |                                                               |                                                               |                                       |
| chr3        | 27369211      | 27607977    |                                                               |                                                               |                                       |
| chr3        | 32627446      | 32758839    |                                                               |                                                               |                                       |
| chr3        | 47510474      | 48192618    |                                                               |                                                               |                                       |
| chr3        | 49195300      | 49415508    |                                                               |                                                               |                                       |
| chr3        | 49972414      | 50088975    |                                                               |                                                               |                                       |
| chr3        | 57659275      | 57987445    |                                                               |                                                               |                                       |
| chr3        | 93794694      | 93992813    |                                                               |                                                               |                                       |
| chr3        | 109246829     | 109451710   |                                                               |                                                               |                                       |
| chr3        | 121461715     | 121575559   |                                                               |                                                               |                                       |
| chr3        | 125446706     | 125586874   |                                                               |                                                               |                                       |
| chr3        | 136327166     | 136748776   |                                                               |                                                               |                                       |
| chr3        | 141928486     | 142383422   |                                                               |                                                               |                                       |
| chr3        | 153007487     | 153145543   |                                                               |                                                               |                                       |
| chr3        | 155707030     | 155906268   |                                                               |                                                               |                                       |
| chr3        | 177222323     | 177276348   |                                                               |                                                               |                                       |
| chr3        | 183596159     | 183831367   |                                                               |                                                               |                                       |
| chr3        | 185514495     | 185631566   |                                                               |                                                               |                                       |
| chr3        | 185793497     | 185916445   |                                                               |                                                               |                                       |

|      |           |           |                                     |                                     |     |
|------|-----------|-----------|-------------------------------------|-------------------------------------|-----|
| chr3 | 195311174 | 195412448 |                                     |                                     |     |
| chr3 | 196397702 | 196534331 |                                     |                                     |     |
| chr3 | 196653381 | 196850362 |                                     |                                     |     |
| chr4 | 25732795  | 25758882  |                                     |                                     |     |
| chr4 | 39352717  | 40173338  |                                     |                                     |     |
| chr4 | 40471689  | 40801700  |                                     |                                     |     |
| chr4 | 48810828  | 48869071  |                                     |                                     |     |
| chr4 | 56732553  | 57039205  |                                     |                                     |     |
| chr4 | 70769273  | 71116641  |                                     |                                     |     |
| chr4 | 88138224  | 88262858  |                                     |                                     |     |
| chr4 | 108749303 | 108839687 |                                     |                                     |     |
| chr4 | 112521720 | 112697473 |                                     |                                     |     |
| chr4 | 127921622 | 128185413 |                                     |                                     |     |
| chr4 | 128712913 | 128778268 |                                     |                                     |     |
| chr4 | 139151702 | 139343727 |                                     |                                     |     |
| chr4 | 164745950 | 164910752 |                                     |                                     |     |
| chr4 | 188083155 | 188339073 |                                     |                                     |     |
| chr5 | 32297962  | 32409457  |                                     |                                     |     |
| chr5 | 45888519  | 46398991  |                                     |                                     |     |
| chr5 | 50144698  | 50405648  |                                     |                                     |     |
| chr5 | 56027372  | 56160869  |                                     |                                     |     |
| chr5 | 69077621  | 70328678  |                                     |                                     |     |
| chr5 | 80265268  | 80383186  |                                     |                                     |     |
| chr5 | 126561616 | 126796341 |                                     |                                     |     |
| chr5 | 134653706 | 134818494 |                                     |                                     |     |
| chr5 | 157005426 | 157095755 |                                     |                                     |     |
| chr5 | 160096285 | 160228116 |                                     |                                     |     |
| chr5 | 180401363 | 180451188 |                                     |                                     |     |
| chr6 | 10602105  | 10622676  |                                     |                                     |     |
| chr6 | 10762201  | 10794068  | 10786801-10787000;10787101-10787200 | 10786801-10787000;10787101-10787200 | MAK |
| chr6 | 17299435  | 17688474  |                                     |                                     |     |
| chr6 | 18122311  | 18215201  |                                     |                                     |     |
| chr6 | 21572400  | 21701354  |                                     |                                     |     |
| chr6 | 30512251  | 30542286  |                                     |                                     |     |
| chr6 | 31070275  | 31074635  |                                     |                                     |     |
| chr6 | 31218147  | 31222799  |                                     |                                     |     |
| chr6 | 31586382  | 31590036  |                                     |                                     |     |
| chr6 | 32255921  | 32270672  |                                     |                                     |     |
| chr6 | 34590409  | 34823647  |                                     |                                     |     |
| chr6 | 42489126  | 42841567  |                                     |                                     |     |
| chr6 | 73203906  | 73640630  |                                     |                                     |     |
| chr6 | 87541110  | 87552228  |                                     |                                     |     |
| chr6 | 87584076  | 87800145  |                                     |                                     |     |
| chr6 | 88937618  | 89113196  |                                     |                                     |     |
| chr6 | 106646935 | 106691569 |                                     |                                     |     |
| chr6 | 106861004 | 107302026 |                                     |                                     |     |
| chr6 | 110697636 | 111057269 |                                     |                                     |     |

|       |           |           |  |  |
|-------|-----------|-----------|--|--|
| chr6  | 134094530 | 134290122 |  |  |
| chr6  | 150898965 | 150927721 |  |  |
| chr6  | 154670203 | 154791629 |  |  |
| chr7  | 152474058 | 152553603 |  |  |
| chr7  | 152687630 | 152719713 |  |  |
| chr8  | 39968734  | 40003202  |  |  |
| chr8  | 42589865  | 42731214  |  |  |
| chr8  | 43548966  | 43976244  |  |  |
| chr8  | 45944781  | 46360719  |  |  |
| chr8  | 56000933  | 56084629  |  |  |
| chr8  | 66695906  | 67035970  |  |  |
| chr8  | 69867144  | 70008543  |  |  |
| chr8  | 73711496  | 74029019  |  |  |
| chr8  | 80150668  | 80454889  |  |  |
| chr8  | 94735791  | 94832007  |  |  |
| chr9  | 751662    | 902311    |  |  |
| chr9  | 6610145   | 6775089   |  |  |
| chr9  | 15360401  | 15417865  |  |  |
| chr9  | 15564504  | 15635380  |  |  |
| chr9  | 18988309  | 19331183  |  |  |
| chr9  | 26783678  | 27038539  |  |  |
| chr9  | 33807622  | 34365032  |  |  |
| chr9  | 36172516  | 36641994  |  |  |
| chr9  | 71803749  | 72152054  |  |  |
| chr9  | 76340497  | 76510161  |  |  |
| chr9  | 77167020  | 77231597  |  |  |
| chr9  | 83734515  | 83820030  |  |  |
| chr9  | 84345142  | 84421031  |  |  |
| chr9  | 86172815  | 86241971  |  |  |
| chr9  | 96263562  | 96844094  |  |  |
| chr9  | 104981387 | 105085205 |  |  |
| chr9  | 107432378 | 107544092 |  |  |
| chr9  | 111893087 | 112513884 |  |  |
| chr9  | 124849983 | 125364302 |  |  |
| chr9  | 129908240 | 130117264 |  |  |
| chr9  | 130538508 | 130623435 |  |  |
| chr10 | 11935705  | 12147092  |  |  |
| chr10 | 12212516  | 12320488  |  |  |
| chr10 | 13272317  | 13296478  |  |  |
| chr10 | 21373419  | 21636759  |  |  |
| chr10 | 30497226  | 30573492  |  |  |
| chr10 | 32152920  | 32195631  |  |  |
| chr10 | 34750153  | 34989940  |  |  |
| chr10 | 35216346  | 35261106  |  |  |
| chr10 | 36526302  | 36853269  |  |  |
| chr10 | 63089820  | 63416834  |  |  |
| chr10 | 67794325  | 68116947  |  |  |

|       |           |           |  |  |
|-------|-----------|-----------|--|--|
| chr10 | 68157998  | 68197454  |  |  |
| chr10 | 68421227  | 69008370  |  |  |
| chr10 | 72374026  | 73528699  |  |  |
| chr10 | 74692645  | 74752987  |  |  |
| chr10 | 92112717  | 92793516  |  |  |
| chr11 | 3696967   | 3761630   |  |  |
| chr11 | 9224608   | 9585408   |  |  |
| chr11 | 18297908  | 18687715  |  |  |
| chr11 | 32497949  | 32570975  |  |  |
| chr11 | 33081598  | 33365070  |  |  |
| chr11 | 47335062  | 47335998  |  |  |
| chr11 | 47349863  | 47351432  |  |  |
| chr11 | 47614047  | 47962063  |  |  |
| chr11 | 55035600  | 55153102  |  |  |
| chr11 | 107756868 | 108142529 |  |  |
| chr12 | 676755    | 835156    |  |  |
| chr12 | 928247    | 1099344   |  |  |
| chr12 | 1200073   | 1282631   |  |  |
| chr12 | 7607454   | 7964524   |  |  |
| chr12 | 19229988  | 19571611  |  |  |
| chr12 | 31528597  | 31922673  |  |  |
| chr12 | 32011128  | 32082369  |  |  |
| chr12 | 37497617  | 38015281  |  |  |
| chr12 | 50163762  | 51302894  |  |  |
| chr12 | 56454563  | 56593167  |  |  |
| chr12 | 64455920  | 64626580  |  |  |
| chr12 | 95208795  | 95374695  |  |  |
| chr12 | 95536069  | 95694649  |  |  |
| chr12 | 96409093  | 96534052  |  |  |
| chr12 | 98437154  | 98612485  |  |  |
| chr12 | 101468859 | 101560180 |  |  |
| chr12 | 110115916 | 110645170 |  |  |
| chr12 | 111476554 | 111730027 |  |  |
| chr12 | 120834751 | 120980418 |  |  |
| chr12 | 121167560 | 121198618 |  |  |
| chr12 | 122249730 | 122773223 |  |  |
| chr13 | 19667630  | 19959928  |  |  |
| chr13 | 20860547  | 21006396  |  |  |
| chr13 | 28067988  | 28173463  |  |  |
| chr13 | 44641318  | 44695574  |  |  |
| chr13 | 44969959  | 45283991  |  |  |
| chr13 | 48013841  | 48057543  |  |  |
| chr13 | 48306330  | 48309352  |  |  |
| chr13 | 49448076  | 50008076  |  |  |
| chr13 | 72952170  | 73012708  |  |  |
| chr13 | 95287449  | 95387714  |  |  |
| chr14 | 18226020  | 18597531  |  |  |



|       |           |           |                   |        |
|-------|-----------|-----------|-------------------|--------|
| chr14 | 34414032  | 35392612  |                   |        |
| chr14 | 49634985  | 49938786  |                   |        |
| chr14 | 50126803  | 50298560  |                   |        |
| chr14 | 63649056  | 63927604  |                   |        |
| chr14 | 102536381 | 102607800 |                   |        |
| chr15 | 22804033  | 23039644  |                   |        |
| chr15 | 41030730  | 41413896  |                   |        |
| chr15 | 44179266  | 44643219  |                   |        |
| chr15 | 50258031  | 50737806  |                   |        |
| chr15 | 64205413  | 64656404  |                   |        |
| chr15 | 98562803  | 98588562  |                   |        |
| chr16 | 9015048   | 9122794   |                   |        |
| chr16 | 10264025  | 10492179  |                   |        |
| chr16 | 18916138  | 19133410  |                   |        |
| chr16 | 19438839  | 19616090  |                   |        |
| chr16 | 35760404  | 36022890  |                   |        |
| chr16 | 58675243  | 58832542  |                   |        |
| chr16 | 68838934  | 69808567  |                   |        |
| chr17 | 839486    | 934664    |                   |        |
| chr17 | 1273696   | 1397225   |                   |        |
| chr17 | 2488112   | 2670197   |                   |        |
| chr17 | 2692871   | 2774484   |                   |        |
| chr17 | 19837231  | 20050132  |                   |        |
| chr17 | 26941116  | 27164482  |                   |        |
| chr17 | 29299154  | 29492282  |                   |        |
| chr17 | 37268235  | 37477828  |                   |        |
| chr17 | 43063370  | 43092939  |                   |        |
| chr17 | 43094516  | 43126420  |                   |        |
| chr17 | 58631423  | 59375677  |                   |        |
| chr17 | 59714615  | 59927560  |                   |        |
| chr17 | 61598756  | 61693477  |                   |        |
| chr17 | 61961298  | 62394188  |                   |        |
| chr17 | 64544881  | 64696197  |                   |        |
| chr18 | 20932565  | 21774317  |                   |        |
| chr18 | 32028017  | 32147838  |                   |        |
| chr18 | 57649601  | 57691915  |                   |        |
| chr19 | 6533640   | 6643289   |                   |        |
| chr19 | 6951095   | 7103959   |                   |        |
| chr19 | 8134474   | 8208953   |                   |        |
| chr19 | 11560254  | 11706482  |                   |        |
| chr19 | 12597220  | 12649891  |                   |        |
| chr19 | 14571552  | 14701255  | 14649801-14649900 | ADGRE3 |
| chr19 | 16680586  | 16817245  | 16754501-16754600 | NWD1   |
| chr19 | 20448323  | 21427482  |                   |        |
| chr19 | 21689836  | 21838370  |                   |        |
| chr19 | 23590034  | 23812918  |                   |        |
| chr19 | 24049459  | 24435205  | 24179701-24179800 |        |

|       |          |          |                   |  |
|-------|----------|----------|-------------------|--|
| chr19 | 27241251 | 27575884 |                   |  |
| chr19 | 36432067 | 36632746 |                   |  |
| chr19 | 53539770 | 53785562 | 53648201-53648600 |  |
| chr20 | 61563044 | 61634567 |                   |  |
| chr20 | 63332435 | 63369826 |                   |  |
| chr21 | 36112594 | 36192427 |                   |  |
| chr22 | 17184683 | 17271460 |                   |  |
| chr22 | 28696413 | 28786494 |                   |  |
| chr22 | 31668448 | 31772794 |                   |  |
| chr22 | 41003010 | 41174388 |                   |  |
| chrX  | 32342021 | 32349467 |                   |  |
| chrY  | 12733073 | 12846634 |                   |  |
| chrY  | 13075160 | 13262055 |                   |  |
| chrY  | 16701071 | 16989164 |                   |  |

SupplementaryTable 5: Outputs from the Fluidigm qPCR array, as determined by the HTqPCR package

| Gene      | GBM+VitC vs. GBM-p.value | GBM+VitC vs. GBM-Mean of logFC | GBM+VitC vs. GBM-SEM of logFC | GBM+5Aza vs. GBM-p.value | GBM+5Aza vs. GBM-Mean of logFC | GBM+5Aza vs. GBM-SEM of logFC |
|-----------|--------------------------|--------------------------------|-------------------------------|--------------------------|--------------------------------|-------------------------------|
| ABHD17A   | 0.8490108                | 0.531815748                    | 0.471267664                   | 0.093669061              | 2.035206082                    | 0.888290972                   |
| ABR       | 0.000779018              | 1.637500694                    | 0.219994705                   | 4.85E-05                 | 2.177948773                    | 0.371490866                   |
| ADGRB1    | 0.901807243              | 0.4540474                      | 0.688531043                   | 0.22862308               | 1.34541738                     | 0.755178138                   |
| ANGPT2    | 0.6272323                | 0.567438859                    | 0.275089159                   | 0.009109337              | -0.087223653                   | 0.700368489                   |
| ARHGEF10  | 0.794460223              | 0.532310264                    | 0.639460279                   | 0.006046615              | 2.405845201                    | 0.931744972                   |
| ARHGEF10L | 0.174136941              | 1.160629147                    | 0.794525951                   | 0.000274234              | 3.450230016                    | 0.925723315                   |
| ARHGEF7   | 0.444790778              | 0.116748582                    | 0.685152105                   | 0.067912114              | 1.624173397                    | 0.791331168                   |
| ASIC3     | 0.872555138              | 0.484506505                    | 0.73726712                    | 0.005279999              | 2.430836802                    | 0.769438041                   |
| B4GALNT3  | 0.188721827              | 1.06277943                     | 0.717833631                   | 0.000671238              | 2.967967263                    | 0.910452133                   |
| BAHCC1    | 0.899497648              | 0.512426905                    | 1.152050092                   | 0.00179199               | 4.028273369                    | 1.040520502                   |
| BMP7      | 0.172011155              | 0.810481803                    | 0.450915782                   | 0.001697444              | 1.978753202                    | 0.720904415                   |
| CCDC88C   | 0.909230707              | 0.340595972                    | 0.861606777                   | 0.000592546              | 3.489416587                    | 0.930328459                   |
| COL22A1   | 0.716688933              | 0.25197351                     | 0.687462134                   | 0.038996333              | 1.853451457                    | 0.86072692                    |
| COL26A1   | 0.660491347              | 0.64674025                     | 0.615210997                   | 0.195662046              | 1.609787815                    | 0.992982915                   |
| COL4A2    | 0.082828394              | -0.266978376                   | 0.337412828                   | 0.692421062              | 0.742221011                    | 0.732515011                   |
| COL8A2    | 0.153290071              | -3.877288984                   | 3.861033534                   | 0.342694564              | 3.67197231                     | 0.912532026                   |
| CROCCP2   | 0.560795708              | 0.628885328                    | 0.674540634                   | 0.010594962              | 1.985174326                    | 0.769986149                   |
| CUX1      | 0.418386418              | 0.762785899                    | 0.640724588                   | 0.000265748              | 2.970052799                    | 0.849109794                   |
| CYP4F11   | 0.088127715              | 2.854609297                    | 0.101145164                   | 0.036593216              | 3.584800989                    | 0.089738439                   |
| DCC       | 0.121052958              | -0.379223094                   | 0.352091878                   | 0.70821687               | 0.70555742                     | 0.907759156                   |
| DGCR8     | 0.524954124              | 0.735930006                    | 0.860358038                   | 0.000671606              | 3.09782705                     | 0.829034681                   |
| DMRTA2    | 0.671078557              | 0.734988459                    | 0.770399736                   | 0.02259973               | 2.826544555                    | 1.280642807                   |
| DNAAF5    | 0.438932546              | 0.112988297                    | 0.419509272                   | 0.036320556              | 1.748867489                    | 0.794028996                   |
| EGFR      | 0.00571896               | 1.466617051                    | 0.339930905                   | 5.09E-05                 | 2.517367905                    | 0.426870256                   |
| ELFN1     | 0.058460855              | 4.692104609                    | 0.536038994                   | 0.030896726              | 5.882679696                    | 0.705224219                   |
| ELN       | 0.596834795              | 0.061281599                    | 0.934233274                   | 0.000457229              | 3.843044038                    | 0.998020589                   |
| ENO2      | 0.039918341              | 1.16520356                     | 0.325032835                   | 0.526237815              | 1.104155215                    | 0.755054982                   |
| ERICH3    | 0.783017539              | 0.263015918                    | 0.834178296                   | 0.00115282               | 3.018152102                    | 0.608623099                   |
| EXD3      | 0.950460622              | 0.43934338                     | 0.92006191                    | 0.008645986              | 2.383839331                    | 0.697640694                   |
| FAM20C    | 0.236367676              | 0.954935219                    | 0.727710299                   | 0.000452798              | 2.922464468                    | 0.770603566                   |
| FAM234B   | 0.851388205              | 0.478811176                    | 0.595640685                   | 0.015070112              | 1.91844585                     | 0.82672592                    |
| FAM49A    | 0.155342164              | 0.638597776                    | 0.272015875                   | 0.004948555              | 1.394296545                    | 0.413237723                   |
| FZR1      | 0.429534978              | 0.749092528                    | 0.477328788                   | 0.005174275              | 2.285187686                    | 0.903674987                   |
| GET4      | 0.516247405              | 0.629857459                    | 0.551541197                   | 0.030264064              | 1.692469056                    | 0.729928408                   |
| GPR35     | 0.184704867              | 1.007091361                    | 0.81966101                    | 0.05956931               | 1.769290586                    | 0.782553808                   |
| HIVEP3    | 0.022023753              | 1.639298763                    | 0.718840156                   | 0.000197309              | 3.298153169                    | 0.892548001                   |
| HSD11B1L  | 0.372407775              | 0.126234137                    | 0.461965533                   | 0.074957102              | 1.479384972                    | 0.683149226                   |
| IQCE      | 0.749193741              | 0.307979753                    | 0.596453248                   | 0.005612192              | 1.904330012                    | 0.699370676                   |
| JRK       | 0.183310936              | 1.079186094                    | 0.749824521                   | 6.94E-05                 | 3.598726556                    | 0.928025804                   |
| KIF17     | 0.042888221              | 1.054665064                    | 0.384972797                   | 0.010331208              | 1.749389442                    | 0.731742367                   |
| KREMEN1   | 0.150784988              | 1.142841279                    | 0.802936154                   | 9.02E-05                 | 3.548327874                    | 0.85345768                    |
| KRT7      | 0.153486987              | -2.970079528                   | 3.194383723                   | 0.947768315              | 1.036736719                    | 0.909057389                   |
| LINC01006 | 0.304569383              | 0.836487065                    | 0.692540835                   | 0.169730658              | 1.470145974                    | 0.751196993                   |
| MEIS3     | 0.563825434              | 0.290231711                    | 0.570791593                   | 0.956106046              | 0.876685084                    | 0.527024162                   |

|          |             |              |             |             |             |             |
|----------|-------------|--------------|-------------|-------------|-------------|-------------|
| MTCL1    | 0.884138659 | 0.469029593  | 0.73036444  | 0.000140759 | 3.028597104 | 0.794233994 |
| MUC12    | 0.122763335 | 5.824927242  | 3.580190106 | 0.006655766 | 11.43736147 | 2.881270576 |
| MUC3A    | 0.655353067 | -1.008341301 | 0.351205852 | 0.150456344 | 3.348173427 | 2.720679524 |
| MYH7B    | 0.445250458 | 0.097644419  | 0.570342434 | 0.001873163 | 2.414622386 | 0.833969134 |
| MYO7A    | 0.250117449 | -0.040480267 | 0.541774236 | 0.001857696 | 2.332150526 | 0.816459006 |
| MYRF     | 0.346945364 | 1.045647979  | 0.980357665 | 0.002034504 | 3.38496777  | 1.001549113 |
| MYRFL    | 0.033506797 | -5.397535906 | 3.393563686 | 0.573033184 | 2.303053497 | 0.770183617 |
| NCAPG2   | 0.981581605 | 0.399490624  | 0.452877244 | 0.056127015 | 1.67059078  | 0.754820824 |
| NDUFAF5  | 0.462794724 | 0.636094619  | 0.536227121 | 0.001808196 | 2.057395804 | 0.690379435 |
| NFKBIB   | 0.810981403 | 0.33666836   | 0.445797632 | 0.073383711 | 1.461466479 | 0.692779129 |
| NGEF     | 0.801052354 | 0.330759224  | 0.415671602 | 0.055146639 | 0.253319909 | 0.656874922 |
| NKAIN4   | 0.778547483 | -0.04463983  | 0.086030808 | 2.37E-06    | 1.11238846  | 0.133641299 |
| NSUN6    | 0.403709282 | 0.174119076  | 0.396671019 | 0.023048073 | 1.58413776  | 0.632358839 |
| NWD1     | 0.857355446 | -0.372601495 | 3.623711857 | 0.248410402 | 6.030528405 | 3.126932966 |
| OPRL1    | 0.084834048 | 1.225585995  | 0.733649909 | 0.000383764 | 2.953950872 | 0.809003863 |
| P2RX5    | 0.183474667 | 0.089802362  | 0.371379764 | 0.623622491 | 1.001818772 | 0.599141145 |
| PIP5K1C  | 0.629017123 | 0.642564811  | 0.804016979 | 0.00142785  | 2.783555429 | 0.82189893  |
| PLEC     | 0.872214045 | 0.507208796  | 0.838106666 | 0.00092469  | 3.434203589 | 1.046629467 |
| PLXNA4   | 0.000167548 | 2.292469529  | 0.317067072 | 0.002014605 | 1.731189525 | 0.406445124 |
| POMT1    | 0.168035517 | -0.028167793 | 0.460779463 | 0.765424874 | 0.9788782   | 0.685583749 |
| PPP1R12C | 0.000118611 | 1.386320935  | 0.156081694 | 1.43E-05    | 1.684477014 | 0.265178343 |
| PRDM16   | 0.004437841 | 1.885771033  | 0.684583544 | 5.06E-06    | 4.051596416 | 0.816521399 |
| PRKAR1B  | 0.07196897  | 0.876015598  | 0.486207345 | 4.51E-05    | 2.307608771 | 0.695967087 |
| PRKCA    | 0.126022946 | 1.033887303  | 0.608802998 | 0.000344191 | 2.714153292 | 0.882939404 |
| PRRT4    | 0.139283293 | -0.47880361  | 0.835385891 | 0.420096376 | 1.357123279 | 0.989539503 |
| PTPRN2   | 0.127327969 | 0.687940617  | 0.09231575  | 0.001251632 | 1.671138999 | 0.352194864 |
| PTPRS    | 0.868916686 | 0.474686332  | 0.703179598 | 0.017645025 | 1.952494037 | 0.625356348 |
| RFNG     | 0.599953728 | 0.584219477  | 0.565493026 | 0.001345222 | 2.208579384 | 0.7811225   |
| SCNN1D   | 0.34004755  | 0.116942652  | 0.671369645 | 0.019633044 | 1.667745566 | 0.609978177 |
| SDK1     | 0.347243942 | 0.840158146  | 0.658676427 | 0.000141135 | 3.220575872 | 0.912296081 |
| SERINC2  | 0.015274435 | -0.12683558  | 0.502223245 | 0.001161811 | 0.096546829 | 0.611766953 |
| SH3RF3   | 0.13987869  | 0.848202747  | 0.494633341 | 1.24E-05    | 2.773435997 | 0.735752533 |
| SHC2     | 2.02E-06    | 1.477460502  | 0.094607532 | 2.79E-06    | 1.439701646 | 0.167908811 |
| SHC3     | 0.161511803 | 0.773608768  | 0.505351455 | 0.000978033 | 1.923219116 | 0.681860452 |
| SLCO4A1  | 0.035094065 | -0.257425132 | 0.358249729 | 0.643159226 | 0.753365369 | 0.71470039  |
| SPPL2B   | 0.000430854 | 1.335409552  | 0.224466492 | 1.19E-05    | 1.884552985 | 0.242299864 |
| ST3GAL3  | 0.463185087 | 0.669989037  | 0.536358768 | 0.001622079 | 2.252057487 | 0.847530649 |
| TNS1     | 0.351653674 | 0.843156807  | 0.624777998 | 0.015812416 | 2.132530706 | 0.941698187 |
| TOP1MT   | 0.195548665 | 0.815352568  | 0.517910783 | 5.76E-05    | 2.61525311  | 0.756431561 |
| TSC2     | 0.278842802 | 0.807584718  | 0.679278961 | 0.000189351 | 2.691165774 | 0.759809656 |
| TSNARE1  | 0.621189961 | 0.544640625  | 0.522681019 | 0.000783903 | 2.053011817 | 0.743674529 |
| VSTM2A   | 0.021010852 | 0.643538211  | 0.194012205 | 0.672437995 | 0.108329681 | 0.132271922 |
| WNK2     | 0.019155665 | 1.970983345  | 0.940689734 | 4.80E-05    | 4.343589222 | 0.846637115 |
| ZNF358   | 0.539483405 | 0.255344064  | 0.51564775  | 0.11489287  | 1.297478229 | 0.610122424 |

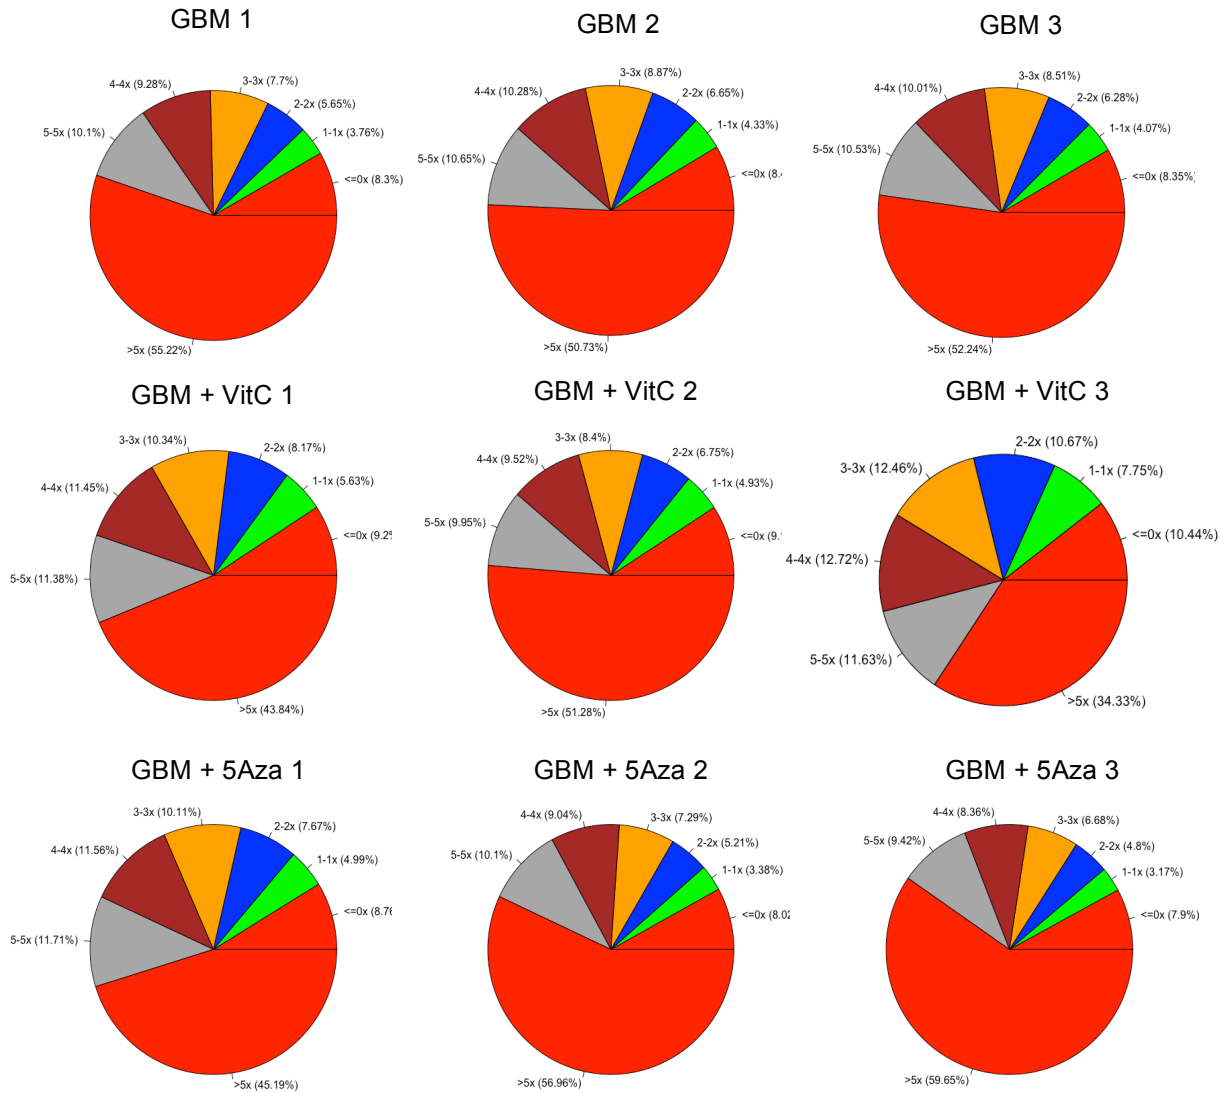

**Supplementary Figure 1. Coverage analysis of CpGs from the MeDIP-Seq data using the MEDIPS package.** The total number of CpG sites in the human genome was fractionised into pie charts according to the level of coverage. 7 fractions were used. <=0x in the upper red fraction: CpG sites that were not covered; 1-1x in the green fraction: CpG sites that were covered once; 2-2x in the blue fraction: CpG sites that were covered twice; 3-3x in the orange fraction: CpG sites covered three times; 4-4x in the brown fraction: CpG sites covered 4 times; 5-5x in the grey fraction: CpG sites covered 5 times; >5x in the lower red fraction: CpG sites covered more than 5 times. The first row is for the GBM cohort; the second row is for the GBM+VitC cohort; and the third row is for the GBM+5Aza cohort.

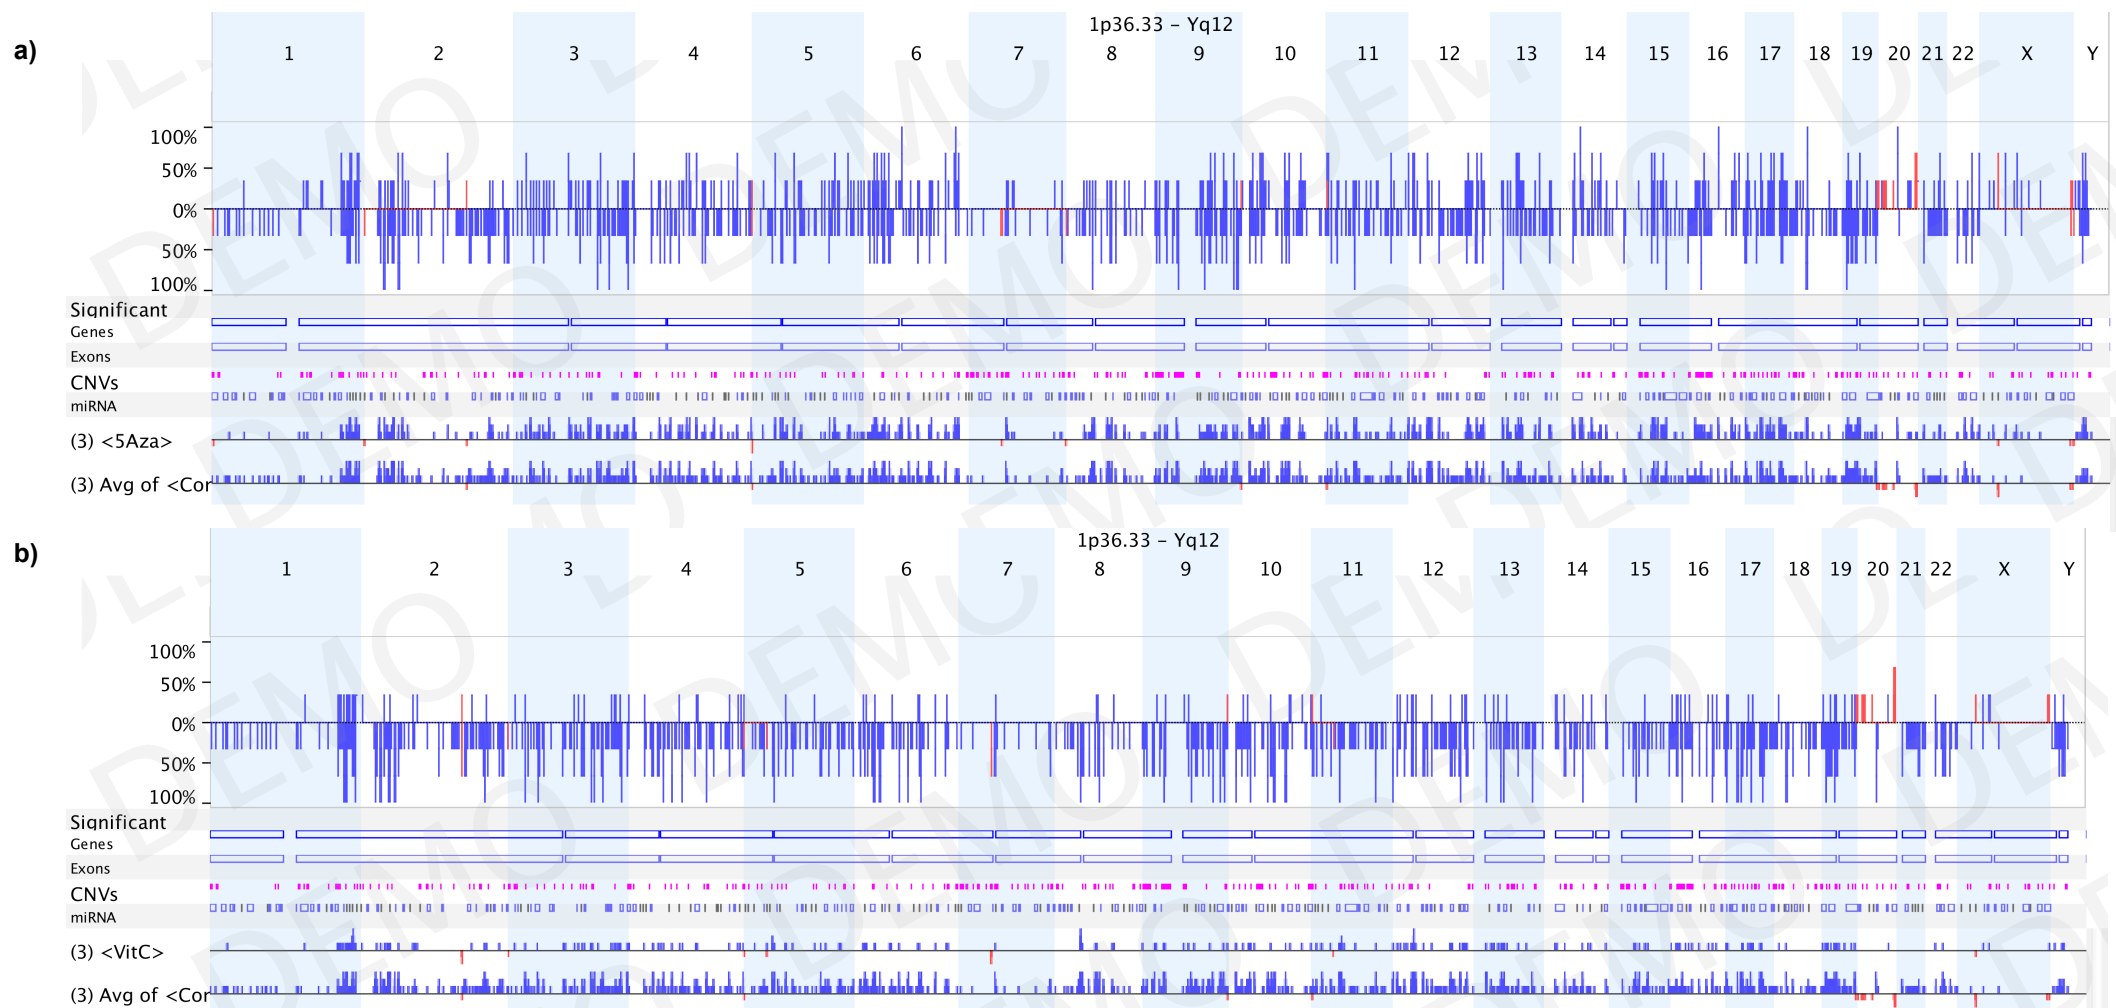

**Supplementary Figure 2. Whole genome CNV comparisons between the GBM, the GBM+VitC and the GBM+5Aza cohorts, as determined by Nexus Copy Number Module (9.0).** In comparisons between the: **a)** GBM+VitC and GBM cohorts; and **b)** GBM+5Aza and GBM cohorts, the upper panel shows copy number enrichment for each chromosome. Blue bars represent copy number gains, whereas red bars indicate copy number loss. Bars above 0% indicate CNVs identified in the treated cohorts, bars below 0% indicate CNVs in the GBM cohort. The panel 'Significant' indicates the significant CNVs between the two cohorts. The panels of 'Genes', 'Exons', 'CNVs', and 'miRNA' are genome annotations. The two panels at the bottom show the mean copy number value of the triplicates in each cohort.

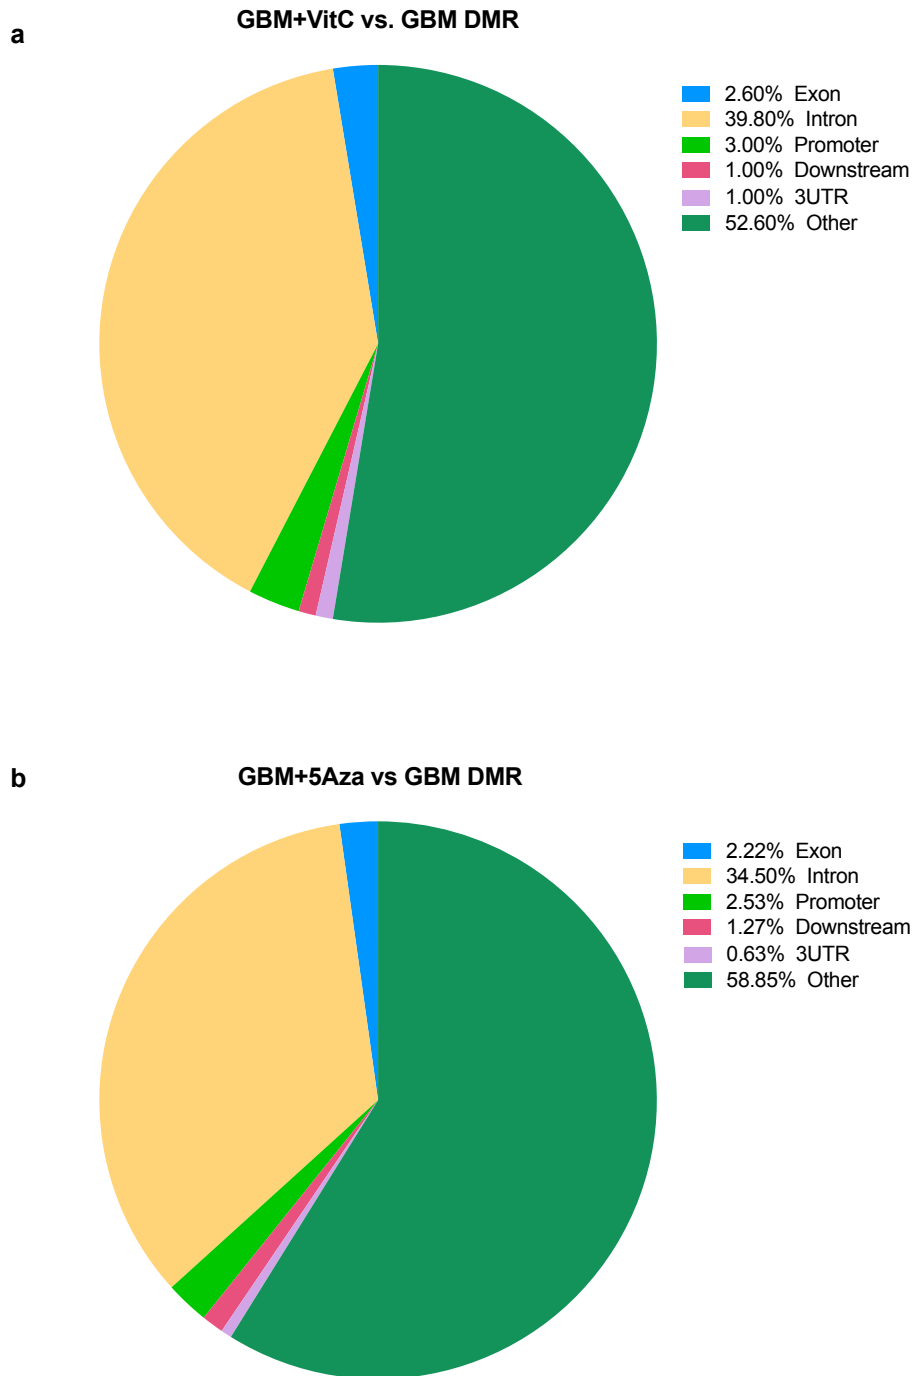

**Supplementary Figure 3. Annotations of the DMRs.** DMRs were sub-grouped into exon (blue), intron (yellow), promoter (green), downstream regions ( $\leq 3$ kb; pink), 3UTR (purple) and intragenic regions (dark green) based on their genomic locations. The percentages of each part were calculated based on the number of corresponding DMRs out of the total number of DMRs. The basal distribution for genomic elements, based on size, in the human genome is 1.5% for exons, 24% for introns and 75% for other intergenic regions (1).

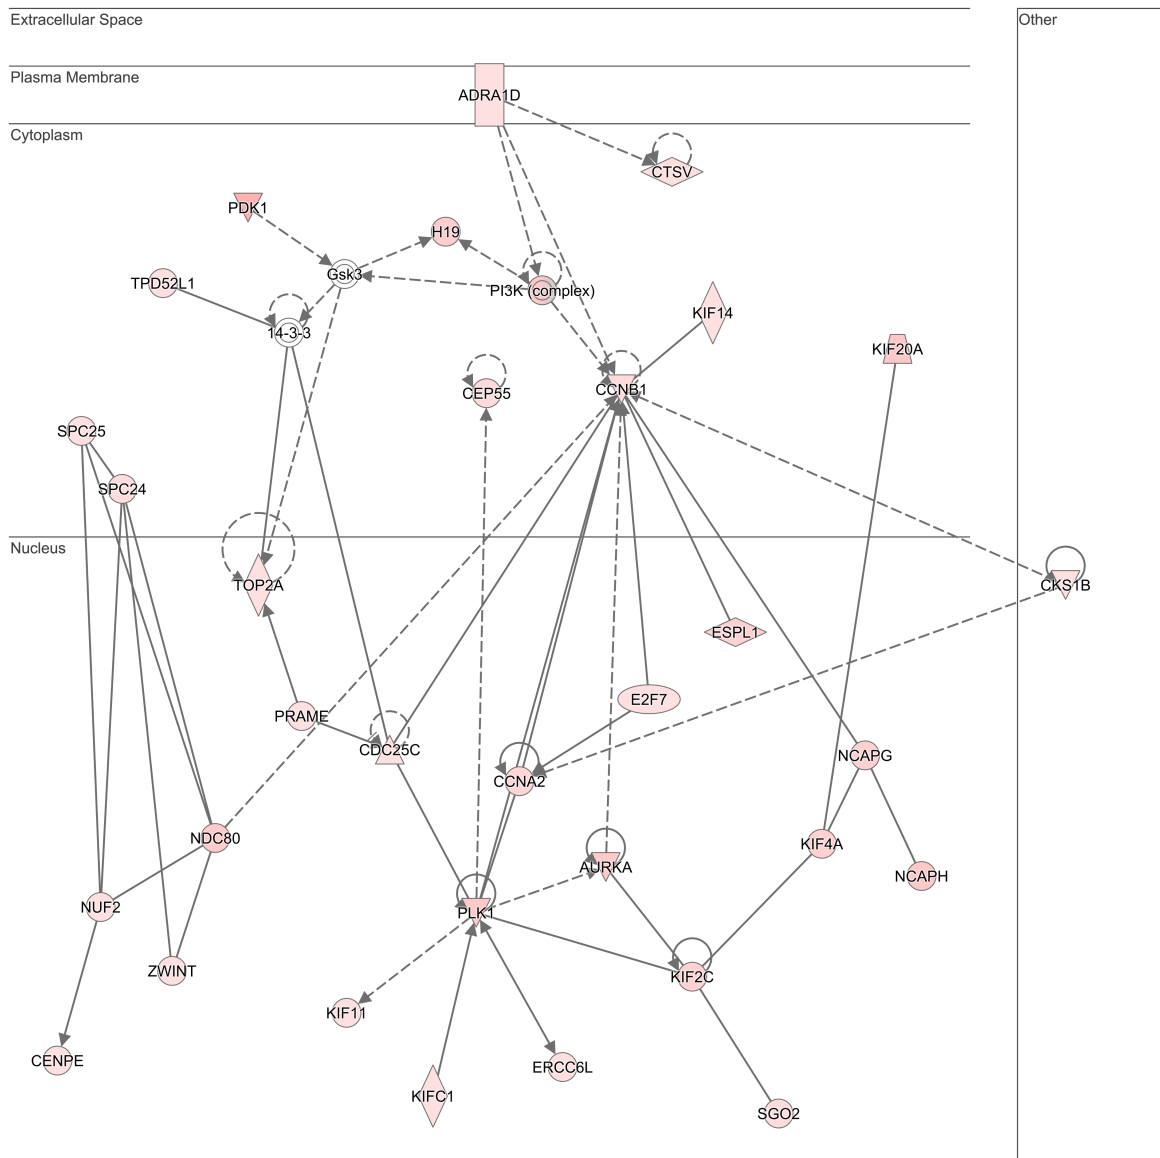

**Supplementary Figure 4. The top enriched network of differentially expressed genes induced by VitC.** A total of 32 molecules were identified to be associated with the functions of the cell cycle, cellular assembly and organization, and DNA replication, recombination, and repair. The network is presented in relation to its sub-cellular locations. The colour strength (from white to red) correlates with the fold-change in up-regulation of gene expression. Therefore, pink is indicative of up-regulation induced by VitC.



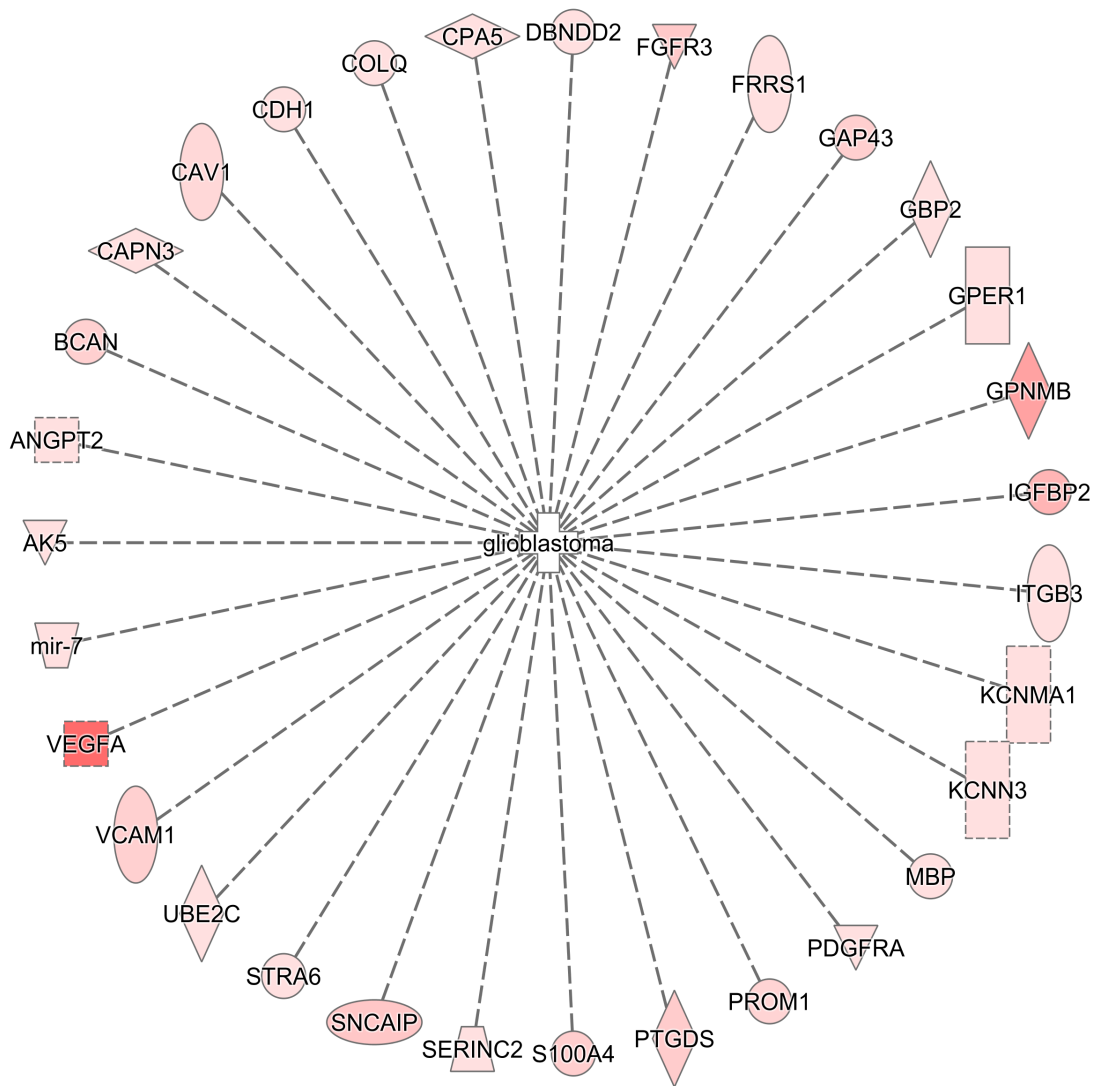

**Supplementary Figure 5. The glioblastoma disease pathway affected by VitC.** Genes associated with the disease pathway are presented as a circular display. The pathway figure was exported from IPA software. The colour strength (from white to red) correlates with the fold-change in up-regulation. Molecules in red indicate higher levels of increased gene expression whilst pink is more indicative of moderate up-regulation induced by VitC.

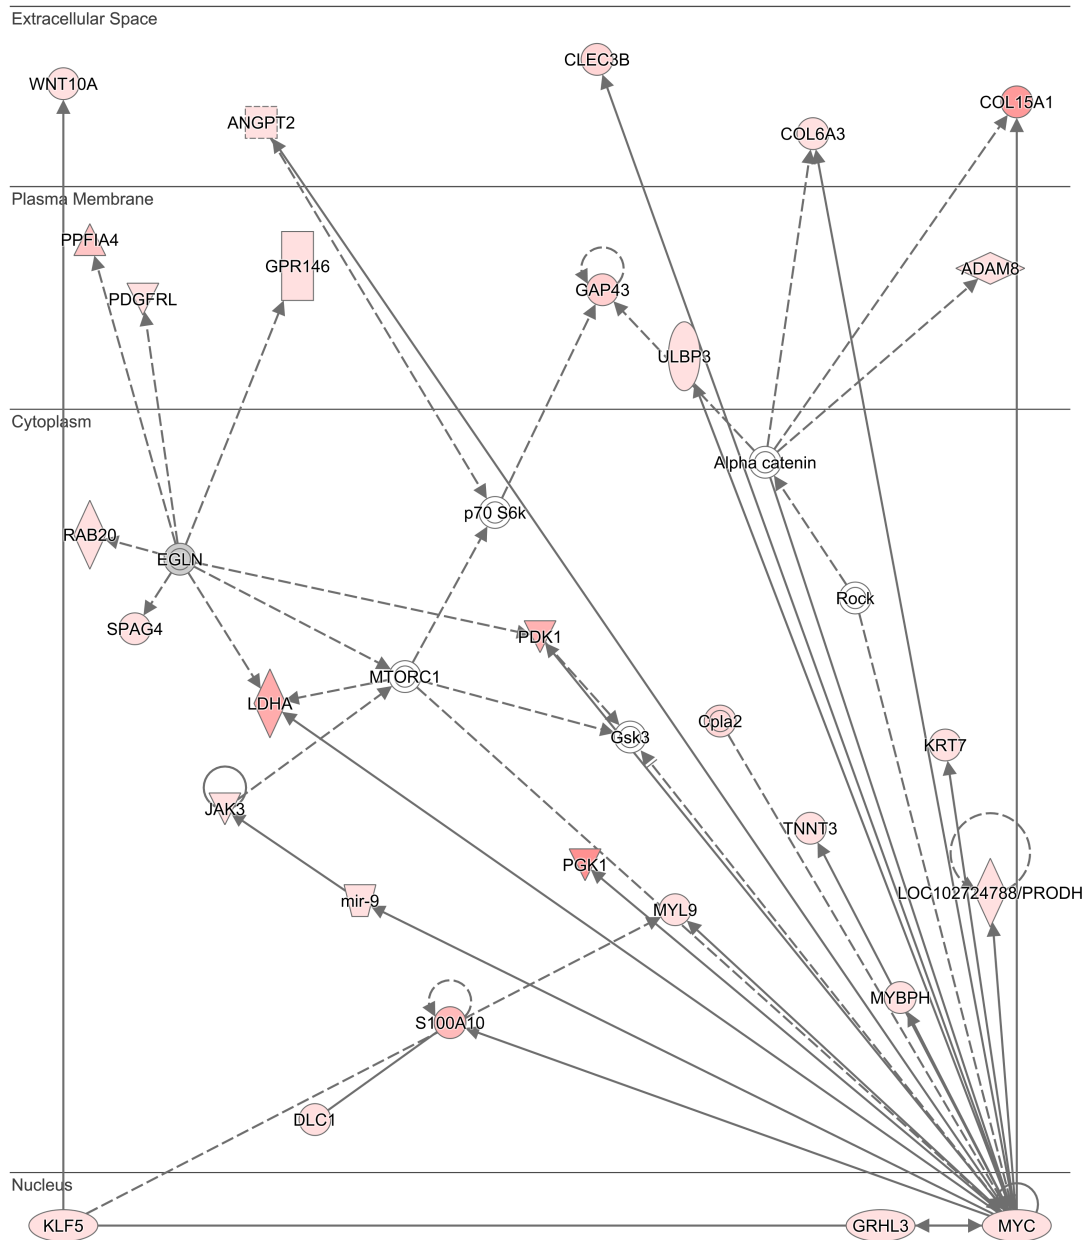

**Supplementary Figure 6. The top enriched network of differentially expressed genes induced by 5Aza.** The 28 molecules were identified to be associated with cell morphology, cellular function and maintenance, and carbohydrate metabolism. The network is presented in relation to its sub-cellular locations. The colour strength (from white to red) correlates with the fold-change in up-regulation of gene expression induced by 5Aza.

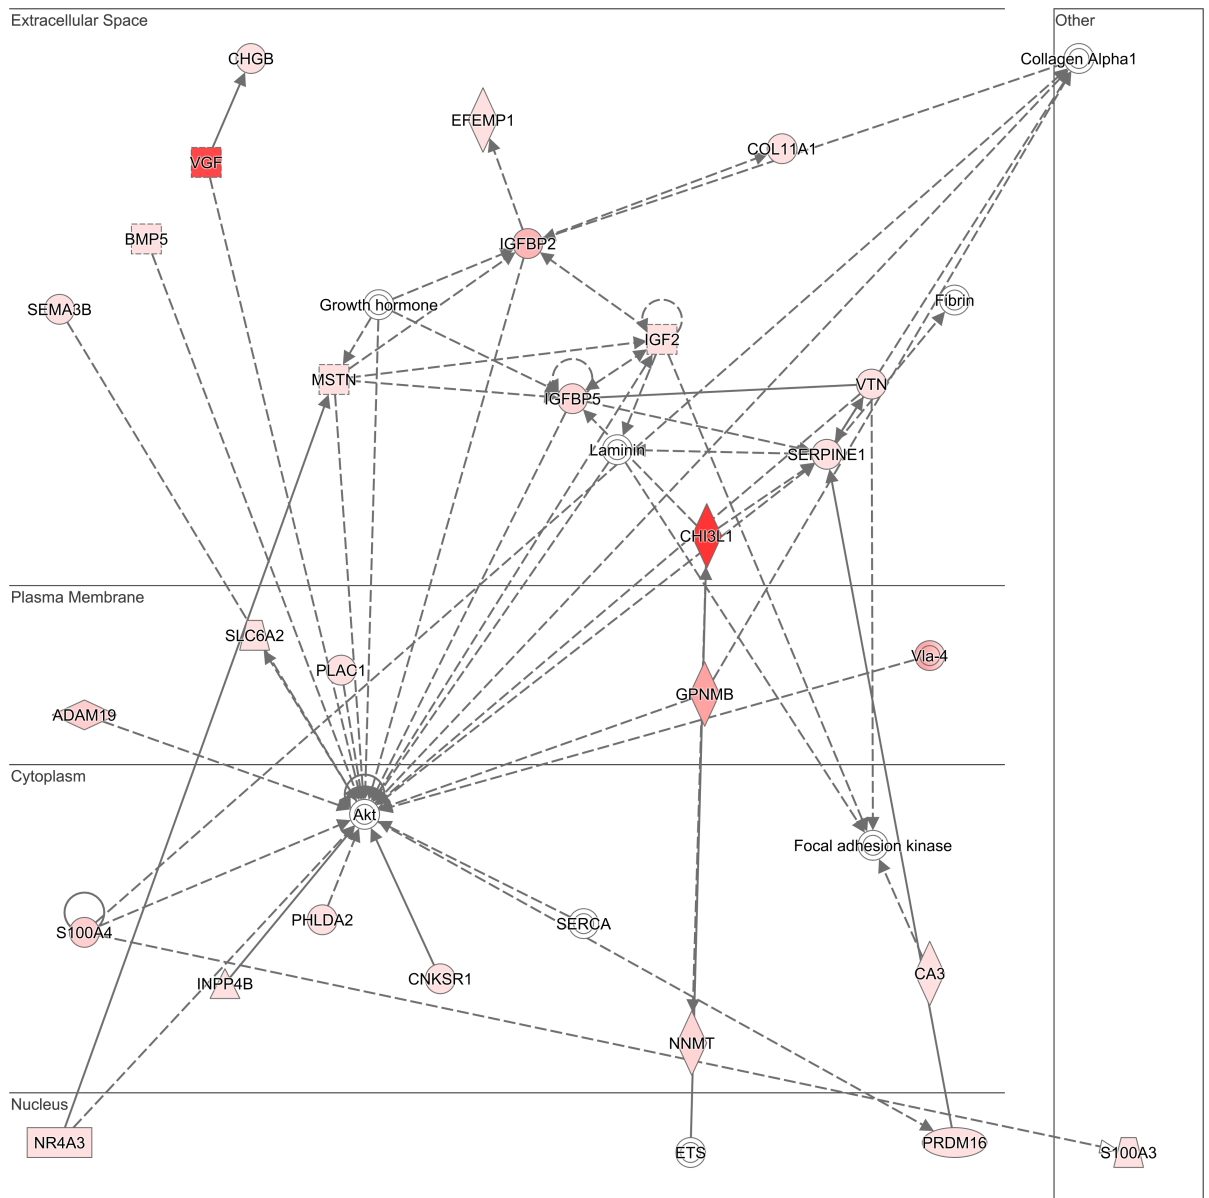

**Supplementary Figure 7. The second most enriched network of differentially expressed genes induced by 5Aza.** 26 molecules were identified to be associated with cancer, neurological disease, and organismal injury and abnormalities. The pathway figure was exported from IPA software. The network is presented in relation to its sub-cellular locations. Molecules in red indicate increased gene expression. The colour strength (from white to red) correlates with the fold-change in up-regulation of gene expression induced by 5Aza.

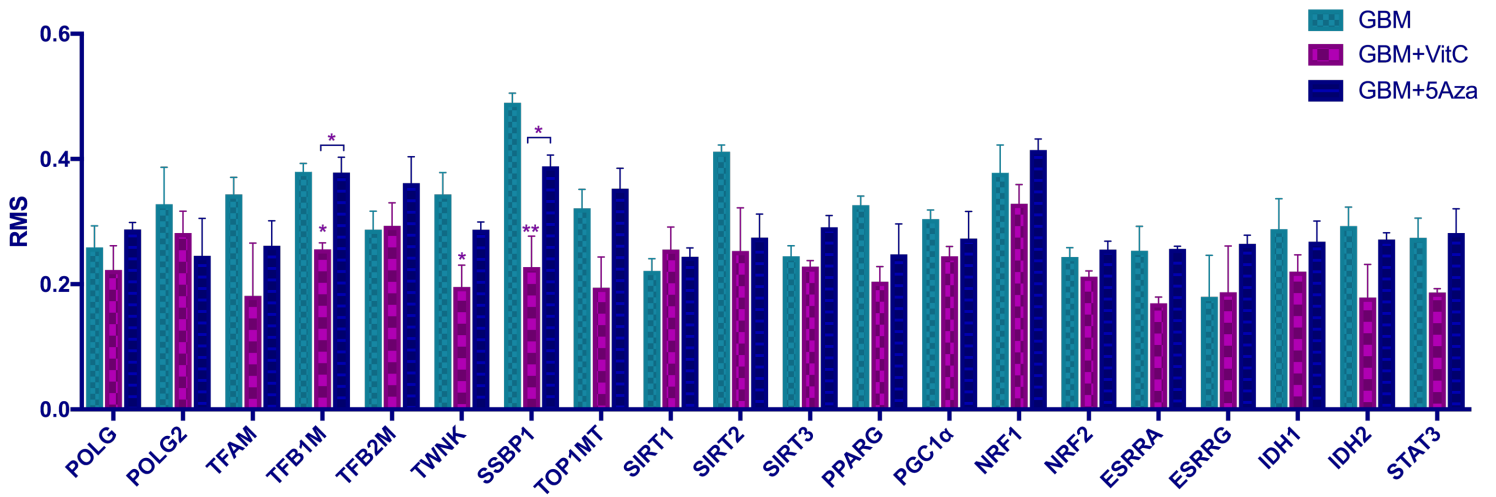

**Supplementary Figure 8.** DNA methylation levels over the CGIs located within the promoter regions of the mtDNA transcription and replication factors. DNA methylation levels expressed as RMS over the CGIs located in the promoter regions of the mtDNA transcription and replication factors are shown (n=3). Statistical analysis was performed using one-way ANOVA between the three cohorts. Bars represent the mean  $\pm$  SEM. \* and \*\* indicate *p* values of < 0.05 and 0.01, respectively. The GBM cohort is shown by the light blue bars; GBM+VitC cohort is shown by the purple bars, the GBM+5Aza cohort is represented by the dark blue bars.

## REFERENCE

1. Venter, J.C., Adams, M.D., Myers, E.W., Li, P.W., Mural, R.J., Sutton, G.G., Smith, H.O., Yandell, M., Evans, C.A., Holt, R.A. *et al.* (2001) The sequence of the human genome. *Science*, **291**, 1304-1351.
